# Supplementary material for: Cloning and Functional Characterisation of the Duplicated RDL Subunits from the Pea Aphid, Acyrthosiphon pisum
Source: PubMed Central journal article supplement (PMC6121307; doi:10.3390/ijms19082235), 2018-07-31
Supplement: ijms-19-02235-s001.pdf [file ijms-19-02235-s001.pdf]

---

*Acyrtosiphon pisum* cysLGIC peptide sequences

---

>Apisum\_RDL1

MTGRAAHTVTTTAWLVACVAFMAPPDAHAAAPGGGMFGDVNISAILDSFSLSYDKRVRPNYGGTP  
IEVGVVTMYVLSISSLSEVKMDFTLDFYFRQFWTDPRLAFTKRPGVETLSVGSEFIKNIWVPDTFFVNE  
KQSYFHIATTSNEFIRIHSGSITRSIRLTITASCPMNLQYFPMDRQLCHIEIESFGYTMRDIRYKWN  
EGPNSVGVSNVSLPQFKVLGHRQRAMEISLTTGNYSRLACEIQFVRSMGYYLIQIYIPSGLIVIIISW  
VSFWLNRNATPARVALGVTTVLTMTTLMSSSTNAALPKISYVKSIDVYLGTCFVMVFASLLEYATVGYM  
AKRIQMRKNRFLAIQKIAEQKKGHDTLGHGHSHQQQSRSGHGNMNGHNTLSGHNTLSGHNTLSGHNTL  
SGHNTLSHGLSGHGLPPSHGTMAGHGGYDTHRSHSGHGGGGTLP SQILPGDMDHAHRQT VRFKAHD  
PKNYLKGGSLENTINGRGGDDCNITPLPPQHVMHPSKDINKLYGITPSDIDKYSRIVFPVCFVCFNLM  
YWI IYLHISDVVADDLVLLQADK

>Apisum\_RDL2

MSAWLVACVAFWAPSTPCTHAASMYGDVNISAILDSFSGSYDKRVRPNYGGTPVEVGVVTMYVLSISSL  
SEVQMDFTLDFYFRQFWTDPRLAFTKRPGVETLSVGSEFIKNIWVPDTFFVNEKQSYFHIATTSNEFI  
RIHSGSITRSIRLTITASCPMNLQYFPMDRQLCHIEIESFGYTMRDIRYKWNKGPNSVGVSNVSLP  
QFKVLGHRQRAMEISLTTGNYSRLACEIQFVRSMGYYLIQIYIPSGLIVIIISWVSFWLNRNATPARVS  
LGVTTVLTMTTLMSSSTNAALPKISYVKSIDVYLGTCFVMVFASLLEYATVGYMAKRIQMRKNRFLAIQ  
KIAEQKKGSGGGGAGGHSAGHDGSHAHPHHTSRHGHGHSISGHSTLSGHGTLSSGGHGPQSGHGTL  
HGMSHGLASHGTMSSHYDGGGGGHRHSHMGHGGTSLSGSLMAGDL DHTPRQTVRFKAHDPKNYLKG  
SLENTINGRGGDDNITPIPTQHVMHPNKDINKLYGITPSDIDKYSRIVFPVCFICFNLMYWI IYLHIS  
DVVADDLVLLGAD

>Apisum\_GluC1

MASFKEWPSFLMVFLFAHFAQY CSTRIDDDGCNNHKNSQHRCV PKVNYRHKEKEVLDQILGPGSYDA  
RIRPSGVNGTDGPTIVHINL FVRSIMTISDNKMEYSVQLTFREQWMDERLKFNDYNGMKMYLTLTEAN  
RVWMPDLFFSNEKEGHFHNI IMPNVYIRIFPNGLVLYSIRISLTLSCPMNLKLYPLDRQTC SLRMVSG  
WTTDDL VFLWKEGDPVQVVKNLHLPRFTLEKFLTDYCN SKTNTGEYSCLKVDLLFKREFSYLIQIYI  
PCCMLVIVSWVSFWLDQSAV PARVSLGVTTLLT MATQTSGINASLPPVSYTKAIDVWTVGCLTFVFGA  
LLEFALVNYASRSDTHRDDMSKKCDLERTVSMVDGYEDGPN SFNMKPLMRPELMSRDKMSQI IHQT  
PPMEKNSCWKSWSMKFPTRSKRIDVISRILFPMVFAMFNMSY WSTYLFREGVDEDK

>Apisum\_GluC2

MVPFAVLAVTCSAYLFAVGPSSYGAKMNLQIILDSLLKKNYDRRATPTNHLDNATTVHCELYIRSFG  
SISPVTMDYEVLDYLRQKQDARLQHKDITESLDLNDPNLVKAIWKPEVYFPNAKHAEFQFVTVPNVL  
IRIKPDGDILYMLRRLKLTFS CMMDL SKFPLDNQICTMEVASCEFHHSKTI EELRLEWKNTDPVLM  
GLRMPQFEIVDIVP SDCQESFQIGNYSCLVAQFYLSRSVGFHLVQSYP TMLIVVISWVSFWMDVDSV  
PGR TTLGVTTLLAVGSQSSGIQSGLPQVS YVKAIDVWMTCTAFVFCALLEFTVVNYMWRKLRPDILR  
NILTEPVNGGTAGTKSYDENLPSSPVI PVS VITV LQQECAYSTSVETNTVLARKIDEYSRLLFPVAF  
IAFNALYWPYYLHN

>Apisum\_HisC1

MKNWNTNKISSAIITKLIIFLYVIQFRYSKCLEFRDILPEDAKQYDKMRPPKIDGTATKVHFHVTVMG  
LDSIDENAMTYAADIFFAQ TWKDHRLRLPENMTSEYRLLEVDWLKNIWRPDSFFKNAKAVTFQTMTIP  
NHYMWLYKDKTILYMKLTLTLSCAMNFMIYPHDTQECKLQMESVSHTTDDMI FQWDPEVPLVVDENI  
ELPQLQLVKNQTADCTQVYSTGNFTYYLFHTYIPTCLIVIMSWVSFWIKPEAAPARVTLGVTSLTSL  
TQHAKSQAALPPVSYLKAVDTFMSACTVVFVFMALMEYCLVNI VLGDSMDP PKQLNKKSFNFSFRSNL  
LNDGHSIPPPRPPPAATAAALAATTALAQRNRTRAINIDRFSRVFFPLLFAVLNMTYWVIFARFL

>Apisum\_HisC2

MECFSDQSDIAESDNVVFETSLSLTDILPINPKNYDKNRAPKVQGQPTIVYFHVTVLSLDSINEESMT  
YVADIFLAQSWRDQRLRLPENMS EDIRILDVEWLHDIWRPDCFFKNAKVT FHEM SIPNHYLWLYHDK  
TLLYMSKLTVLVSCAMKFESYPHDTQICSMIESLSHTTHDLVFIWNMTDPLVNPDI ELPQLDISNN  
ITTDCTIEYSTGNFTCLAVMFNLRRLGYHLFHTYIP SALIVMSWISFWIKPEAIPARVTLGVTSLL  
TLATQNTQSQQSLPPVSYVKAIDIWSSCSIFVFLSLMEFAVNNYMGPVATKVMKGYSEEDIRGGDD  
FKELDPKNRSPIRS VATVAAPQYPTFCNGRAIALYIDKFSRFFFPSFFILNVAYWTSFL

>Apisum\_pHC11

MERIWRLQLAASFLVPLLQNVLSDDVDFENGKSDKEILDNLVNPTRYDKRLLPPVDDQDFCCGMKTP  
QDVRVILPSANRHPPIRKGKYEVEFLLQQQWYDPRRLYSNQSRDYDFLNAIHGGDIWVPDITYFIMHGDF  
KASLIPVHFSRLRIYRNGSVHYLMRRHLILSCQGILNIFPFDDPQCTFSMESVSYEMSAIKYVWKNDES  
TLKKSPSLKTLNAYLDRNHTTECPSTGSRGEVNLIFTRDRAFYFTTVFIPGIILVTSSFITFFLEWN  
AVPARVMIGVTTMLNFFTTSSNGFRSTLPVVSNLTAMNVWDGVCMCCEIYASLLEFVLVNYVGRKRSDWP  
LPIVYQNKDQDYKQITQSDKTQGECSGCGACTHSLHNTCPKTEEQNIRSNGGNKRKMPHPPIRI  
AKTIDVIARITFPTAYAVFLIFFFIHYTSHPSHWSQ

>Apisum\_pHC12

MNFSKLLYVSILCVSILKYSESVQPKEVPFKFENGKSDKHILDHLLNTDIYDKRLLPPSYGPSIVNVS  
VVLFTLSSPDESSLKYDIEFLLQQEWYDSRLKYPNQTAFSVLNGIHHQGDIDLPTNFHMHGDFKPSQ  
RPIRFTLVNYNDGRVEYTTTRRHMLLVCEGSMKIFPFDDPQCTFSMESISYEKSDLKYVWKNEDNFVLIK  
SPNLKTSNAYLERNRTEYCASTGSRGNYSCLQVELIFSRDRTFYFATIFIPGLILVTSSFITFFLEW  
DAVPARTIIGVTTMLNYFTTSSNSFRRTLDPVANLTAMNVWDGVCMCFFVASFIEFVIVNCTGRRNVKS  
NISSNAGSCSISKKITKEFKCPECAQNVCSHSLLDVLPKVNEKIATKPSDQVHLAMRIDTVARLTFP  
SAFVMFLAFFFFYYSANANNRAISVNTN

>Apisum\_12344

MFHLVRSKDFYEMETEYNKNMLPGKDVDVSLSLHINRISGVDESKEEIALDVFLHVYWEDPRIWILGN  
ATQVELTWDKDPKFWIPDLYIRQLREMKVLTFLQDLASIRLYDNSTLRISIGATIIKCDMDFVLYPL  
DVQTCVDFGSCKYTLTDMKFHWRDDPLIFPSPDFGDFRLPRYVVSFVTDNRLNVIYYGDGNHSTARL  
VITLSRELRSHELLSYLPSTLFFVIMSWGFSVVMPEVVPGRMVLLVTTLLSLVTMFDTIRNNSPSALEL  
KCI EVWLISCTLFFVFLALVEYFIVLFGMRYDKHWRHKKRDLGSGGAPSKPPLFGSNKVHATSGNMA  
GDDDSQQHMMTTNSGPVVVASTGKLRFLQITRHVILYCGSPRGTLTLDQVSLALFPLCFVIFSVMYWISY  
LNE SRLKALASVV

>Apisum\_CLGC1

MIGYRGRGLRTLQAVTVIVYTALCIQTVQPACSDNTADGGNRVEMLMWLTDPCRYDRWTRPIPPDGN  
TKTGAPTRVSARVYVYFLGSVEAQQHFTAHLIRYRWRDDRLVHSSSKS IQGENKLERVWTPHVV  
IVNEHDSNIMGSGRQDILVTVQPDGTVLYSARLKVSLLCMMNLQKFPFDQQTCLILESWTYNSTHLE  
LVWEHDSPAVLNSNLRMTEYNLVS IWTDETVSEYALLPSEDKHDKKEYSPLSVEHVHYYGKFAGNYS  
QLIVNFELEREVGHYIMDYVPSIMLVVSVVSWVFWLDPNAVPGRTTLGTSTMLTFITLSRNIGSSLPK  
VSYIKATEIWFIVCTAFIFGSLVEFAFVNTIWRKTNVELKKNVSKHIFKSTLTPQMQRKISVDSGI  
DRGATGASPTVTSGKLNRRDNRSRSLTVDGVDGPTVCTNPEPLENFSIRVPTLNDNKTGGGGGLFTLT  
PQEIAQWIDQRSRIAFPAAFLVFNCFYWLYVYV

>Apisum\_CLGC2

MFYIKLYNFVVCVLLFTVVLPPLPSAKPNKTCGSEYNDEVSSSEKILRWLTDPCRYDKTVAPGKLVAHNP  
IVVFTRI HVYHLTSVYPRNLDFKVRILLQFRWKDVRLAFDNLAPMDSSEVVCQKILERIWLPNVYIA  
NEKHSLTVADMTEEDLMVTVLPDGTVMLSVRLKTSVFCWVKLGRFPFDRQQCHLIMETCRYDTTQLVLE  
WEVESPVTAALNDNSWVPYLTEYKLLKIIPHSSSEHYVEPISLDPAREYGFYIMDYVPGIILLVTISWV  
SFWMAPDATPARVAIGTSTMLTYFQLGVDTGSKLPNVSYIRSNDLWVIVCTAFIFLSLAEFAFVNTIW  
RYGCHPVKLSKSNKQMFKSSIKASKMSKGI VNNDRPQRTIAAGSLFLDGI RLQNNGTSELNVELPYT  
MEMKAMGKVKFKVSEESARQLHGGLTTTAQQISIWIDEKSRI VFPASFILFNAVYWSLLWV
